# Supplementary material for: Modeling the Neuroanatomical and Neurocognitive Mechanisms of Cognitive Insight in Non-clinical Subjects
Source: Springer Nature journal article supplement (doi:10.1007/s10608-015-9674-8), 2015-03-13
Supplement: MOESM1 [file 535880]

**Supplementary Figure.** Cortical parcellation of the pars opercularis, pars triangularis and pars orbitalis as created with the Desikan-Killiany atlas in FreeSurfer.


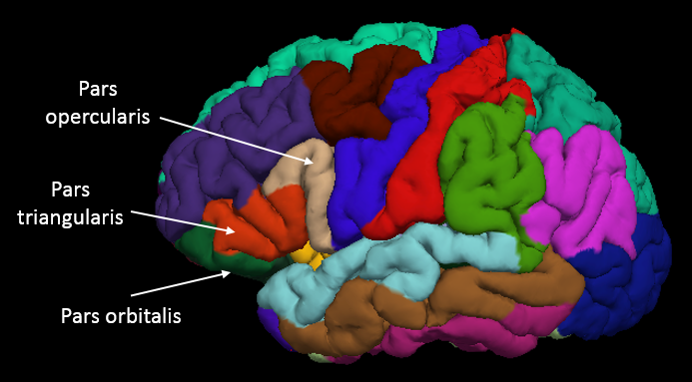


**Article title:** Modeling the neuroanatomical and neurocognitive mechanisms of cognitive insight in non-clinical subjects

**Journal name:** Cognitive Therapy and Research

**Author names:** Lisa Buchy & Martin Lepage

**Affiliation and email of the corresponding author:** Martin Lepage, PhD, Douglas Mental Health University Institute, 6875 LaSalle Blvd., Verdun, Quebec, Canada, H4H 1R3. E-mail: martin.lepage@mcgill.ca
